# Supplementary material
Source: HighWire-hosted journal article supplement (https://www.annals.org/content/suppl/2008/09/09/0000605-200810210-00242)
Supplement: Qayyum_AT_149-8-DC1-A1.pdf [file Qayyum_AT_149-8-DC1-A1.pdf]

**Appendix Table. Characteristics of the Included Studies**

| Author, Year (Reference)                          | Study Duration | Group                        | Patients, <i>n</i> | Mean Age, <i>y</i> | Men, %          | Mean BMI (Body Weight), <i>kg/m<sup>2</sup> (kg)</i> | Mean Duration of Diabetes, <i>y</i> | Mean HbA <sub>1c</sub> or FG Level* | Previous Treatment, <i>n (%)</i>                               |
|---------------------------------------------------|----------------|------------------------------|--------------------|--------------------|-----------------|------------------------------------------------------|-------------------------------------|-------------------------------------|----------------------------------------------------------------|
| <b>Randomized Controlled Trials</b>               |                |                              |                    |                    |                 |                                                      |                                     |                                     |                                                                |
| Abrahamian et al., 2005 (25)                      | 24 weeks       | Insulin aspart 70/30         | 89                 | 62.6               | 52              | 28                                                   | 12.7                                | HbA <sub>1c</sub> , 9.8%            | Insulin naive: No                                              |
|                                                   |                | NPH/regular 70/30            | 88                 | 62.3               | 35              | 28.3                                                 | 9.5                                 | HbA <sub>1c</sub> , 9.85%           | Insulin naive: No                                              |
| Bebakar et al., 2007 (19)                         | 24 weeks       | Insulin aspart 70/30 + OAAs  | 128                | 55                 | 92              | 26.2                                                 | 4.4                                 | HbA <sub>1c</sub> , 8.6%            | Insulin naive: Yes<br>OAAs: 128 (100)                          |
|                                                   |                | OAAs                         | 63                 | 52.7               | 69              | 25.4                                                 | 4.3                                 | HbA <sub>1c</sub> , 8.5%            | Insulin naive: Yes<br>OAAs: 63 (100)                           |
| Boehm et al., 2004 (28); Boehm et al., 2002 (73)‡ | 104 weeks      | Insulin aspart 70/30         | 58                 | 62.8               | 55 <sup>†</sup> | 29.1                                                 | 15.5                                | HbA <sub>1c</sub> , 8.11%           | Insulin naive: No                                              |
|                                                   |                | NPH/regular 70/30            | 67                 | 62.6               | 51 <sup>†</sup> | 27.2                                                 | 12.9                                | HbA <sub>1c</sub> , 8.21%           | Insulin naive: No                                              |
| Christiansen et al., 2003 (32)                    | 16 weeks       | Insulin aspart 70/30         | 201                | 59.3               | 47              | 28                                                   | 9.2                                 | HbA <sub>1c</sub> , 8.8%            | Insulin: 66 (33)<br>OAAs: 78 (39)<br>Insulin and OAAs: 55 (27) |
|                                                   |                | NPH insulin                  | 202                | 59.6               | 50              | 28.4                                                 | 10.5                                | HbA <sub>1c</sub> , 8.8%            | Insulin: 66 (33)<br>OAAs: 75 (37)<br>Insulin and OAAs: 59 (29) |
| Herz et al., 2002 (34)                            | 16 weeks       | Insulin lispro 75/25         | 71                 | 68.1               | 52.1            | 28                                                   | 11.4                                | HbA <sub>1c</sub> , 9.82%           | Insulin naive: No                                              |
|                                                   |                | Glyburide                    | 72                 | 67.7               | 44.4            | 27.8                                                 | 12.4                                | HbA <sub>1c</sub> , 9.9%            | Insulin naive: No                                              |
| Hirao et al., 2008 (40)                           | 6 months       | Insulin aspart 70/30         | 80                 | 58.5               | 59 <sup>†</sup> | 23.7 (62.5)                                          | 9.5                                 | HbA <sub>1c</sub> , 10.5%           | Insulin naive: No<br>OAAs: 41 (51 <sup>†</sup> )               |
|                                                   |                | Insulin aspart + NPH insulin | 80                 | 57.9               | 61 <sup>†</sup> | 23.7 (62.1)                                          | 12.2                                | HbA <sub>1c</sub> , 10.7%           | Insulin naive: No<br>OAAs: 39 (49 <sup>†</sup> )               |

|                          |          |                                  |     |      |                 |             |                        |                                           |                                               |
|--------------------------|----------|----------------------------------|-----|------|-----------------|-------------|------------------------|-------------------------------------------|-----------------------------------------------|
| Holman et al., 2007 (9)  | 52 weeks | Insulin aspart 70/30**           | 235 | 61.7 | 67.7            | 30.2 (86.9) | 9 median (IQR: 6 - 12) | HbA <sub>1c</sub> , 8.6%; FG, 175 mg/dL   | Insulin naive: Yes<br>OAs: 221 (94†)          |
|                          |          | Insulin aspart**                 | 238 | 61.6 | 63.6            | 29.6 (84.9) | 9 median (IQR: 6 - 14) | HbA <sub>1c</sub> , 8.6%; FG, 173 mg/dL   | Insulin naive: Yes<br>OAs: 227 (95†)          |
|                          |          | Insulin detemir**                | 234 | 61.9 | 61.9            | 29.7 (85.5) | 9 median (IQR: 6 - 12) | HbA <sub>1c</sub> , 8.4%; FG, 171 mg/dL   | Insulin naive: Yes<br>OAs: 224 (96†)          |
|                          |          | Total, 708                       |     | 61.7 | 64.1            | 29.8 (85.8) | 9 median (IQR: 6 - 13) | HbA <sub>1c</sub> , 8.5%; FG, 173 mg/dL   | Insulin naive: Yes<br>OAs: 672 (95†)          |
| Kann et al., 2006 (22)   | 26 weeks | Insulin aspart 70/30 + metformin | 128 | 61.5 | 54 <sup>†</sup> | 29.9 (84.2) | 10.3                   | HbA <sub>1c</sub> , 9.21%                 | NR                                            |
|                          |          | Insulin glargine + glimepiride   | 127 | 61   | 49 <sup>†</sup> | 30.6 (86.6) | 10.2                   | HbA <sub>1c</sub> , 8.9%                  | NR                                            |
| Kazda et al., 2006 (23)  | 24 weeks | Insulin lispro 50/50             | 54  | 58.7 | 59 <sup>†</sup> | 31          | 5.9                    | HbA <sub>1c</sub> , 8.1%; FG, 167.4 mg/dL | Insulin naive: No Insulin: 0 in last 3 months |
|                          |          | Insulin lispro                   | 52  | 60.4 | 62 <sup>†</sup> | 31.7        | 5.3                    | HbA <sub>1c</sub> , 8.2%; FG, 176.4 mg/dL | Insulin naive: No Insulin: 0 in last 3 months |
|                          |          | Insulin glargine                 | 53  | 59.1 | 43 <sup>†</sup> | 30.1        | 5.5                    | HbA <sub>1c</sub> , 8.1%; FG, 172.8 mg/dL | Insulin naive: No Insulin: 0 in last 3 months |
| Kilo et al., 2003 (33)   | 12 weeks | Insulin aspart 70/30¶            | 46  | 57.2 | 54              | 30.4        | 10.4                   | HbA <sub>1c</sub> , 9.5%; FG, 241.8 mg/dL | Insulin naive: Yes<br>OAs: 46 (100)           |
|                          |          | NPH insulin¶                     | 47  | 55.1 | 40              | 30.4        | 10.7                   | HbA <sub>1c</sub> , 9.5%; FG, 242.7 mg/dL | Insulin naive: Yes<br>OAs: 47 (100)           |
|                          |          | NPH/regular 70/30¶               | 47  | 55.4 | 52              | 30.6        | 8.4                    | HbA <sub>1c</sub> , 9.3%; FG, 227.2 mg/dL | Insulin naive: Yes<br>OAs: 47 (100)           |
| Kvapil et al., 2006 (24) | 16 weeks | Insulin aspart 70/30             | 107 | 55.2 | 47 <sup>†</sup> | 30.9 (87.3) | 8.2                    | HbA <sub>1c</sub> , 9.6%                  | Insulin naive: NR                             |
|                          |          | Insulin aspart 70/30¶            | 108 | 56.4 | 49 <sup>†</sup> | 30.4 (85.1) | 6.7                    | HbA <sub>1c</sub> , 9.3%                  | Insulin naive: NR                             |
|                          |          | Glibenclamide¶                   | 114 | 58.1 | 46 <sup>†</sup> | 30.5 (84)   | 8.1                    | HbA <sub>1c</sub> , 9.4%                  | Insulin naive: NR                             |

|                                                  |          |                          |     |      |                 |             |      |                                            |                                                         |
|--------------------------------------------------|----------|--------------------------|-----|------|-----------------|-------------|------|--------------------------------------------|---------------------------------------------------------|
| Malone et al., 2003 (31)                         | 16 weeks | Insulin lispro 75/25¶    | 296 | 58   | 57              | 29.8 (83)   | 8    | HbA <sub>1c</sub> , 9.17%                  | Insulin naive: NR<br>OAAAs: 296 (100)                   |
|                                                  |          | Glibenclamide¶           | 301 | 59   | 49              | 29.6 (81.7) | 7.4  | HbA <sub>1c</sub> , 9.27%                  | Insulin naive: NR<br>OAAAs: 301 (100)                   |
| Nauck et al., 2007 (21)                          | 52 weeks | Insulin aspart 70/30**   | 248 | 58   | 51              | 30.2 (83.4) | 10   | HbA <sub>1c</sub> , 8.6%; FG, 203.4 mg/dL  | Insulin naive: NR<br>OAAAs: 248 (100)                   |
|                                                  |          | Exenatide**              | 253 | 59   | 47              | 30.6 (85.5) | 9.8  | HbA <sub>1c</sub> , 8.6%; FG, 198 mg/dL    | Insulin naive: NR<br>OAAAs: 253 (100)                   |
| Raskin et al., 2005 (27); Brod et al., 2007 (74) | 28 weeks | Insulin aspart 70/30‡‡   | 117 | 52.6 | 53              | 31.5 (90.6) | 9.5  | HbA <sub>1c</sub> , 9.7%; FG, 252 mg/dL    | Insulin naive: Yes<br>OAAAs: 117 (100)                  |
|                                                  |          | Insulin glargine‡‡       | 116 | 52.3 | 56              | 31.4 (89.9) | 8.9  | HbA <sub>1c</sub> , 9.8%; FG, 243 mg/dL    | Insulin naive: Yes<br>OAAAs: 116 (100)                  |
| Raskin et al., 2007 (72)§                        | 28 weeks | Insulin aspart 70/30¶    | 79  | 52   | 51.9            | 31.2 (88.7) | NR   | HbA <sub>1c</sub> , 9.9%; FG, 255.6 mg/dL  | Insulin naive: Yes<br>Insulin: 0 (0)<br>OAAAs: 79 (100) |
|                                                  |          | Insulin glargine¶        | 78  | 51.7 | 53.8            | 30.8 (86.2) | NR   | HbA <sub>1c</sub> , 9.9%; FG, 239.4 mg/dL  | Insulin naive: Yes<br>Insulin: 0 (0)<br>OAAAs: 78 (100) |
| Raskin et al., 2007 (38)                         | 34 weeks | Insulin aspart 70/30‡‡   | 102 | 53.4 | 45 <sup>†</sup> | 32.4        | 9.2  | HbA <sub>1c</sub> , 8.1%                   | Insulin naive: Yes<br>OAAAs: 102 (100)                  |
|                                                  |          | Metformin + pioglitazone | 98  | 54.2 | 39 <sup>†</sup> | 33.4        | 8.3  | HbA <sub>1c</sub> , 8.1%                   | Insulin naive: Yes<br>OAAAs: 98 (100)                   |
| Raz et al., 2003 (30)                            | 6 weeks  | Insulin aspart 70/30§§   | 26  | 60.3 | 73.1            | 27.7        | 10.9 | HbA <sub>1c</sub> , 9.9%; FG, 259.8 mg/dL  | Insulin naive: NR<br>OAAAs: 26 (100)                    |
|                                                  |          | Glibenclamide§§          | 23  | 57.8 | 56.5            | 27.6        | 10.3 | HbA <sub>1c</sub> , 10.3%; FG, 265.2 mg/dL | Insulin naive: NR<br>OAAAs: 23 (100)                    |

|                                                       |          |                                       |     |      |      |             |      |                                             |                                                                          |
|-------------------------------------------------------|----------|---------------------------------------|-----|------|------|-------------|------|---------------------------------------------|--------------------------------------------------------------------------|
| Raz et al., 2005 (26)                                 | 18 weeks | Insulin aspart 70/30                  | 97  | 55.2 | 65   | 29.5        | 10   | HbA <sub>1c</sub> , 9.5%                    | Insulin naive: NR<br>OAAAs: 97† (100)                                    |
|                                                       |          | Insulin aspart 70/30                  | 93  | 56.7 | 53   | 29.4        | 9.2  | HbA <sub>1c</sub> , 9.6%                    | Insulin naive: NR<br>OAAAs: 93† (100)                                    |
|                                                       |          | Glibenclamide                         | 91  | 55.8 | 62   | 29.5        | 9.9  | HbA <sub>1c</sub> , 9.4%                    | Insulin naive: NR<br>OAAAs: 91† (100)                                    |
| Robbins et al., 2007 (37)                             | 24 weeks | Insulin lispro 50/50 ¶                | 157 | 57.4 | 50.3 | 32.1 (89.1) | 11.3 | HbA <sub>1c</sub> , 7.8%                    | Insulin naive: No<br>Insulin: 125 (79.6)                                 |
|                                                       |          | Insulin glargine ¶                    | 158 | 58.1 | 49.4 | 32 (88.1)   | 12.5 | HbA <sub>1c</sub> , 7.8%                    | Insulin naive: No<br>Insulin: 123 (77.8)                                 |
| Rosenstock et al., 2008 (39)                          | 24 weeks | Insulin lispro 50/50 ¶ ¶              | 187 | 55.4 | 53   | 34.1 (99.1) | 10.9 | HbA <sub>1c</sub> , 8.83%; FG, 171.81 mg/dL | Insulin naive: No<br>Insulin: 187 (100)<br>Insulin and OAAAs: 185 (98.9) |
|                                                       |          | Insulin glargine + insulin lispro ¶ ¶ | 187 | 54   | 52   | 34.8 (99.8) | 11.2 | HbA <sub>1c</sub> , 8.89%; FG, 181.48 mg/dL | Insulin naive: No<br>Insulin: 187 (100)<br>Insulin and OAAAs: 184 (98.5) |
| Tamemoto et al., 2007 (20)                            | 24 weeks | Insulin aspart 70/30                  | 14  | 55.9 | 54   | 23.9        | 9.8  | HbA <sub>1c</sub> , 9.13%; FG, 183.3 mg/dL  | Insulin naive: NR<br>OAAAs: 14 (100)                                     |
|                                                       |          | Insulin glargine                      | 20  | 61.7 | 68   | 25.5        | 10.4 | HbA <sub>1c</sub> , 8.45%; FG, 184.1 mg/dL  | Insulin naive: NR<br>OAAAs: 19 (100)                                     |
| Tirgoviste et al., 2003 (29); Roach et al., 2001 (75) | 16 weeks | Insulin lispro 75/25                  | 85  | 58.7 | 35†  | 26.8 (74.1) | 10.3 | HbA <sub>1c</sub> , 9.85%; FG, 208.8 mg/dL  | Insulin naive: Yes<br>OAAAs: 85 (100)                                    |
|                                                       |          | Glibenclamide                         | 87  | 60.3 | 36†  | 27.6 (75.8) | 10.2 | HbA <sub>1c</sub> , 10.07%; FG, 219.6 mg/dL | Insulin naive: Yes<br>OAAAs: 87 (100)                                    |
|                                                       |          | Total, 172                            |     | 59.5 | 35†  | (75)        | 10.2 | NR                                          | Insulin naive: Yes<br>OAAAs: 172 (100)                                   |

|                                                 |                                        |                                              |     |      |                 |             |      |                                            |                                                     |
|-------------------------------------------------|----------------------------------------|----------------------------------------------|-----|------|-----------------|-------------|------|--------------------------------------------|-----------------------------------------------------|
| Ushakova et al., 2007 (36)                      | 8 weeks titration; 8 weeks maintenance | Insulin aspart 70/30 3 times daily           | 104 | 58   | 16.3            | 29.8 (79.3) | 9.9  | HbA <sub>1c</sub> , 10.4%                  | Insulin naive: Yes<br>OAs: 104 (100)                |
|                                                 |                                        | Insulin aspart 70/30 twice daily + metformin | 100 | 58.4 | 27              | 29.2 (78.4) | 8.4  | HbA <sub>1c</sub> , 10.4%                  | Insulin naive: Yes<br>OAs: 100 (100)                |
|                                                 |                                        | OAs                                          | 104 | 58.4 | 20.2            | 29.3 (78)   | 8.3  | HbA <sub>1c</sub> , 10.1%                  | Insulin naive: Yes<br>OAs: 104 (100)                |
| Yamada et al., 2007 (35)                        | 4 months                               | Insulin lispro 50/50                         | 15  | 66   | 80 <sup>†</sup> | 27          | 13.7 | HbA <sub>1c</sub> , 7.59%; FG, 130.3 mg/dL | Insulin naive: No<br>Insulin: 15 (100)              |
|                                                 |                                        | NPH/regular 70/30 + NPH/regular 50/50        | 15  | 66.3 | 73 <sup>†</sup> | 23.8        | 15.9 | HbA <sub>1c</sub> , 7.33%; FG, 141.8 mg/dL | Insulin naive: No<br>Insulin: 15 (100)              |
| <b>Crossover Trials with No Washout Periods</b> |                                        |                                              |     |      |                 |             |      |                                            |                                                     |
| Coscelli et al., 2003 (48)                      | 12 days/period                         | Insulin lispro 75/25                         | 18  | 59.1 | 39              | 29.5 (79)   | 14.9 | FG, 154.2%                                 | Insulin naive: No<br>Insulin: 18 (100)              |
|                                                 |                                        | NPH/regular 70/30                            | 15  | 59.2 | 53              | 30.1 (80.2) | 13.8 | FG, 150.9 mg/dL                            | Insulin naive: No<br>Insulin: 15 (100)              |
|                                                 |                                        | Total, 33                                    | 33  | 59.1 | 45              | 29.8 (79.5) | 14.4 | FG, 152.5 mg/dL                            | Insulin naive: No<br>Insulin: 33 (100)              |
| Cox et al., 2007 (56)                           | 12 weeks/period                        | Insulin lispro 75/25¶                        | 28  | NR   | NR              | NR          | NR   | NR                                         | NR                                                  |
|                                                 |                                        | Insulin glargine¶                            | 28  | NR   | NR              | NR          | NR   | NR                                         | NR                                                  |
|                                                 |                                        | Total, 45                                    | 45  | 52.6 | NR              | 35.08       | 11.9 | NR                                         | Insulin naive: NR<br>OAs: 45 (100)                  |
| Herz et al., 2002 (52)                          | 4 weeks/period                         | Insulin lispro 75/25                         | 19  | 56.3 | 63 <sup>†</sup> | 27 (76)     | 8.9  | NR                                         | Insulin naive: No<br>Insulin: 19 <sup>†</sup> (100) |
|                                                 |                                        | NPH/regular 70/30                            | 18  | 55.3 | 33 <sup>†</sup> | 26.3 (75.8) | 7.5  | NR                                         | Insulin naive: No<br>Insulin: 18 <sup>†</sup> (100) |

|                            |                 |                                                           |    |       |                 |               |       |                                             |                                                                                     |
|----------------------------|-----------------|-----------------------------------------------------------|----|-------|-----------------|---------------|-------|---------------------------------------------|-------------------------------------------------------------------------------------|
| Herz et al., 2003 (50)     | 4 weeks/period  | Insulin lispro 75/25                                      | 13 | 54.8  | 77 <sup>†</sup> | 29.2          | NR    | HbA <sub>1c</sub> , 7.81%                   | Insulin naive: No<br>Insulin: 13 <sup>†</sup> (100)                                 |
|                            |                 | NPH/regular 70/30                                         | 12 | 53.6  | 58 <sup>†</sup> | 29.3          | NR    | HbA <sub>1c</sub> , 7.6%                    | Insulin naive: No<br>Insulin: 12 <sup>†</sup> (100)                                 |
| Jacobber et al., 2006 (43) | 16 weeks/period | Insulin lispro 75/25 + insulin lispro 50/50 <sup>††</sup> | 59 | NR    | NR              | NR            | NR    | NR                                          | NR                                                                                  |
|                            |                 | Insulin glargine <sup>††</sup>                            | 59 | NR    | NR              | NR            | NR    | NR                                          | NR                                                                                  |
|                            |                 | Total, 60                                                 |    | 54.9  | 56.7            | 32.9 (95.1)   | 8.4   | HbA <sub>1c</sub> , 9.21%                   | Insulin naive: Yes<br>OAAAs: 60 (100)                                               |
| Malone et al., 2004 (44)   | 16 weeks/period | Insulin lispro 75/25 <sup>¶</sup>                         | 52 | 54.5  | 63.5            | 30.1 (88.5)   | 8.1   | HbA <sub>1c</sub> , 8.7%; FG, 150.2 mg/dL   | Insulin naive: Yes<br>OAAAs: 52 (100)                                               |
|                            |                 | Insulin glargine <sup>¶</sup>                             | 53 | 55.3  | 62.3            | 31.7 (94.4)   | 9.8   | HbA <sub>1c</sub> , 8.7%; FG, 155.3 mg/dL   | Insulin naive: Yes<br>OAAAs: 53 (100)                                               |
| Malone et al., 2005 (45)   | 16 weeks/period | Insulin lispro 75/25 <sup>¶</sup>                         | 50 | 59.18 | 50              | 29.41 (77.82) | 13.52 | HbA <sub>1c</sub> , 8.5%; FG, 155.34 mg/dL  | Insulin naive: No<br>Insulin: 50 <sup>†</sup> (100)<br>OAAAs: 26 (52 <sup>†</sup> ) |
|                            |                 | Insulin glargine <sup>¶</sup>                             | 47 | 59.63 | 38              | 29.64 (77.21) | 11.9  | HbA <sub>1c</sub> , 8.48%; FG, 147.78 mg/dL | Insulin naive: No<br>Insulin: 47 <sup>†</sup> (100)<br>OAAAs: 28 (60 <sup>†</sup> ) |
| Mattoo et al., 2003 (51)   | 2 weeks/period  | Insulin lispro 75/25                                      | 72 | 54    | 47.2            | 26.9 (71)     | 13.2  | NR                                          | Insulin naive: No<br>Insulin: 72 <sup>†</sup> (100)                                 |
|                            |                 | NPH/regular 70/30                                         | 79 | 52    | 44.3            | 26.5 (71)     | 11.8  | NR                                          | Insulin naive: No<br>Insulin: 79 <sup>†</sup> (100)                                 |
|                            |                 | Total, 151                                                |    | 53    | 45.7            | 26.7 (71)     | 12.5  | NR                                          | Insulin naive: No<br>Insulin: 151 <sup>†</sup> (100)                                |

|                            |                 |                                             |      |                 |                 |             |                          |                                                      |                                                     |
|----------------------------|-----------------|---------------------------------------------|------|-----------------|-----------------|-------------|--------------------------|------------------------------------------------------|-----------------------------------------------------|
| McNally et al., 2007 (41)  | 16 weeks/period | Insulin aspart 70/30                        | 80   | 61.8            | 61 <sup>†</sup> | 29.7 (83.3) | 11.5                     | HbA <sub>1c</sub> , 7.5%                             | Insulin naive: No<br>Insulin: 80 (100)              |
|                            |                 | NPH/regular 70/30                           | 80   | 62.7            | 79 <sup>†</sup> | 30.5 (89.1) | 12.1                     | HbA <sub>1c</sub> , 7.5%                             | Insulin naive: No<br>Insulin: 80 (100)              |
|                            |                 | Total, 160                                  | 62.3 | 70 <sup>†</sup> | 30.1 (86.2)     | 11.8        | HbA <sub>1c</sub> , 7.5% | Insulin naive: No<br>Insulin: 160 (100)              |                                                     |
|                            |                 |                                             |      |                 |                 |             |                          |                                                      |                                                     |
| McSorley et al., 2002 (53) | 2 weeks/period  | Insulin aspart 70/30                        | 13   | NR              | NR              | NR          | NR                       | NR                                                   | NR                                                  |
|                            |                 | NPH/regular 70/30                           | 13   | NR              | NR              | NR          | NR                       | NR                                                   | NR                                                  |
|                            |                 | Total, 13                                   | 64   | 62 <sup>†</sup> | 28.1            | 13          | HbA <sub>1c</sub> , 7.7% | Insulin naive: No<br>Insulin: 13 <sup>†</sup> (100)  |                                                     |
| Niskanen et al., 2004 (46) | 12 weeks/period | Insulin aspart 70/30                        | 132  | NR              | NR              | NR          | NR                       | NR                                                   | NR                                                  |
|                            |                 | Insulin lispro 75/25                        | 132  | NR              | NR              | NR          | NR                       | NR                                                   | NR                                                  |
|                            |                 | Total, 133                                  | 62.3 | 59 <sup>†</sup> | 28.1            | 12.1        | HbA <sub>1c</sub> , 8.5% | Insulin naive: No<br>Insulin: 133 <sup>†</sup> (100) |                                                     |
| Roach et al., 1999 (54)    | 13 weeks        | Insulin lispro 75/25                        | 44   | 56.5            | 52 <sup>†</sup> | 28.3        | 12.8                     | NR                                                   | Insulin naive: No<br>Insulin: 44 <sup>†</sup> (100) |
|                            |                 | NPH/regular 70/30                           | 45   | 57.4            | 42 <sup>†</sup> | 29.4        | 11.5                     | NR                                                   | Insulin naive: No<br>Insulin: 45 <sup>†</sup> (100) |
| Roach et al., 1999 (55)    | 12 weeks/period | Insulin lispro 50/50 + insulin lispro 75/25 | 34   | 58              | 53 <sup>†</sup> | 28.4        | 12.2                     | NR                                                   | Insulin naive: No<br>Insulin: 34 <sup>†</sup> (100) |
|                            |                 | NPH/regular 50/50 + NPH/ regular 70/30      | 29   | 60.2            | 41 <sup>†</sup> | 28.4        | 13.1                     | NR                                                   | Insulin naive: No<br>Insulin: 29 <sup>†</sup> (100) |
| Roach et al., 2003 (49)    | 8 weeks/period  | Insulin lispro 75/25                        | 57   | 53.9            | 40              | 62.8        | 12.4                     | NR                                                   | Insulin naive: No<br>Insulin: 57 <sup>†</sup> (100) |
|                            |                 | Insulin lispro 50/50 + insulin lispro 75/25 | 58   | 54.2            | 40              | 65.1        | 13.1                     | NR                                                   | Insulin naive: No<br>Insulin: 58 <sup>†</sup> (100) |

|                               |                 |                        |      |      |            |      |                          |                                         |                                         |
|-------------------------------|-----------------|------------------------|------|------|------------|------|--------------------------|-----------------------------------------|-----------------------------------------|
| Roach and Malone, 2006 (42)   | 12 weeks/period | Insulin lispro 75/25†† | 20   | NR   | NR         | NR   | NR                       | NR                                      | NR                                      |
|                               |                 | Insulin glargine††     | 20   | NR   | NR         | NR   | NR                       | NR                                      | NR                                      |
|                               |                 | Total, 20              | 53.5 | 50   | 36.7 (108) | NR   | HbA <sub>1c</sub> , 8.4% | Insulin naive: No                       |                                         |
| Scherthauer et al., 2004 (47) | 12 weeks/period | Insulin lispro 50/50   | 18   | 66.1 | 17†        | 29.5 | 16.2                     | HbA <sub>1c</sub> , 8.3                 | Insulin naive: No<br>Insulin: 18† (100) |
|                               |                 | NPH/regular 70/30      | 17   | 67.8 | 29†        | 28.8 | 14.2                     | HbA <sub>1c</sub> , 8.5%                | Insulin naive: No<br>Insulin: 17† (100) |
|                               |                 | Total, 35              | 67   | 23†  | 29.2       | 15.3 | NR                       | Insulin naive: No<br>Insulin: 35† (100) |                                         |

#### Crossover Trials with Washout Period

|                             |                                              |                                                |      |     |      |      |                          |                                         |    |
|-----------------------------|----------------------------------------------|------------------------------------------------|------|-----|------|------|--------------------------|-----------------------------------------|----|
| Hermansen et al., 2002 (59) | 1 day/period, washout period at least 5 days | Insulin aspart 70/30                           | 41   | NR  | NR   | NR   | NR                       | NR                                      | NR |
|                             |                                              | Insulin lispro 75/25                           | 42   | NR  | NR   | NR   | NR                       | NR                                      | NR |
|                             |                                              | NPH/regular 70/30                              | 44   | NR  | NR   | NR   | NR                       | NR                                      | NR |
|                             |                                              | Total, 61                                      | 60.1 | 66† | 27.3 | 11.6 | HbA <sub>1c</sub> , 8.3% | Insulin naive: No<br>Insulin: 61† (100) |    |
| Kapitza et al., 2004 (58)   | 1 day/period, washout period 3 – 21 days     | Insulin aspart 70/30 (15 min. after test meal) | 31   | NR  | NR   | NR   | NR                       | NR                                      | NR |
|                             |                                              | Insulin aspart 70/30 (before meal)             | 31   | NR  | NR   | NR   | NR                       | NR                                      | NR |
|                             |                                              | NPH/regular 70/30 (15 min. before test meal)   | 31   | NR  | NR   | NR   | NR                       | NR                                      | NR |
|                             |                                              | NPH/regular 70/30 (before test meal)           | 31   | NR  | NR   | NR   | NR                       | NR                                      | NR |
|                             |                                              | Total, 31                                      | 57   | 68† | 29   | 12   | HbA <sub>1c</sub> , 8.7% | Insulin naive: No<br>Insulin: 31† (100) |    |

|                                                    |                                          |                                   |      |       |                 |           |       |                                             |                                                           |    |
|----------------------------------------------------|------------------------------------------|-----------------------------------|------|-------|-----------------|-----------|-------|---------------------------------------------|-----------------------------------------------------------|----|
| Malone et al., 2000 (60); Malone et al., 2000 (76) | 1 day/period, washout period 3 – 11 days | Insulin lispro 75/25              | 41   | 59.2  | 63 <sup>†</sup> | 29.1      | 14    | NR                                          | Insulin naive: No<br>Insulin: 41 <sup>†</sup> (100)       |    |
|                                                    |                                          | NPH/regular 70/30                 | 43   | 60.5  | 63 <sup>†</sup> | 29.2      | 16.2  | NR                                          | Insulin naive: No<br>Insulin: 43 <sup>†</sup> (100)       |    |
|                                                    |                                          | Total, 84                         |      | 59.9  | 63 <sup>†</sup> | 29.2      | 15.1  | NR                                          | Insulin naive: No<br>Insulin: 84 <sup>†</sup> (100)       |    |
|                                                    |                                          |                                   |      |       |                 |           |       |                                             |                                                           |    |
| Schwartz et al., 2006 (57)                         | 1 day/period, washout period 3 – 11 days | Insulin lispro 50/50              | 7    | NR    | NR              | NR        | NR    | NR                                          | NR                                                        |    |
|                                                    |                                          | Insulin lispro 75/25              | 8    | NR    | NR              | NR        | NR    | NR                                          | NR                                                        | NR |
|                                                    |                                          | NPH/regular                       | 8    | NR    | NR              | NR        | NR    | NR                                          | NR                                                        | NR |
|                                                    |                                          | Total, 23                         |      | 61.3  | 73.9            | 33 (98.5) | NR    | HbA <sub>1c</sub> , 8.1%; FG, 158.7 mg/dL   | Insulin naive: No<br>Insulin: 23 (100)                    |    |
| <b>Other Study Designs</b>                         |                                          |                                   |      |       |                 |           |       |                                             |                                                           |    |
| Joshi et al., 2005 (17)                            | 12 weeks                                 | Insulin aspart 70/30              | 114  | 52.41 | 67 <sup>†</sup> | 70.4      | 9.53  | HbA <sub>1c</sub> , 8.79%; FG, 186.59 mg/dL | Insulin naive: NR Insulin: 62 (54.39)<br>OAs: 102 (89.47) |    |
|                                                    |                                          | Insulin aspart + insulin glargine | 31   | 51.1  | 77 <sup>†</sup> | 69.63     | 11.98 | HbA <sub>1c</sub> , 8.53%; FG, 190.23 mg/dL | Insulin naive: NR Insulin: 21 (67.74)<br>OAs: 25 (80.65)  |    |
| Sun et al., 2007 (18)                              | 18 months                                | Insulin lispro 75/25              | 895  | 62.8  | 49.1            | 93.9      | 20.5  | HbA <sub>1c</sub> , 8.6%                    | Insulin naive: Yes                                        |    |
|                                                    |                                          | Insulin glargine                  | 3624 | 58.4  | 48.5            | 93.3      | 24.7  | HbA <sub>1c</sub> , 8.6%                    | Insulin naive: Yes                                        |    |
|                                                    |                                          | NPH/regular 70/30                 | 3647 | 65.7  | 44.7            | 92.3      | 18.3  | HbA <sub>1c</sub> , 8.4%                    | Insulin naive: Yes                                        |    |

BMI = body mass index; FG = fasting glucose; IQR = interquartile range; HbA<sub>1c</sub> = hemoglobin A<sub>1c</sub>; NPH = neutral protamine Hagedorn; NR = not reported; OAs = oral antidiabetic agents.

\*To convert glucose values from mg/dL to mmol/L, multiply by 0.0555.

<sup>†</sup>Number has been imputed.

<sup>‡</sup>The study population for was patients with either type 1 or type 2 diabetes. The type 2 diabetic population was the same as that used in reference 28. Boehm and colleagues (73) reported results after 12 weeks of follow-up.

<sup>§</sup>The study was conducted in a subpopulation of patients from reference 27 who were not using thiazolidinediones.

<sup>||</sup>The study group also received diet and exercise.

<sup>¶</sup>The study group also received metformin.

<sup>\*\*</sup>The study group also received metformin and a sulfonylurea.

<sup>††</sup>The study group also received oral antidiabetic agents.

<sup>‡‡</sup>The study group also received metformin and pioglitazone.

<sup>§§</sup>The study group also received rosiglitazone.

<sup>|||</sup>The study group also received pioglitazone.

<sup>¶¶</sup>The study group also received existing oral antidiabetic agents, except for sulfonylureas and glinides.

## References

73. **Boehm BO, Home PD, Behrend C, Kamp NM, Lindholm A.** Premixed insulin aspart 30 vs. premixed human insulin 30/70 twice daily: a randomized trial in Type 1 and Type 2 diabetic patients. *Diabet Med.* 2002;19:393-9. [PMID: 12027927]
74. **Brod M, Cobden D, Lammert M, Bushnell D, Raskin P.** Examining correlates of treatment satisfaction for injectable insulin in type 2 diabetes: lessons learned from a clinical trial comparing biphasic and basal analogues. *Health Qual Life Outcomes.* 2007;5:8. [PMID: 17286868]
75. **Roach P, Koledova E, Metcalfe S, Hultman C, Milicevic Z. Romania/Russia Mix25 Study Group.** Glycemic control with Humalog Mix25 in type 2 diabetes inadequately controlled with glyburide. *Clin Ther.* 2001;23:1732-44. [PMID: 11726007]
76. **Malone JK, Yang H, Woodworth JR, Huang J, Campaigne BN, Halle JP, et al.** Humalog Mix25 offers better mealtime glycemic control in patients with type 1 or type 2 diabetes. *Diabetes Metab.* 2000;26:481-7. [PMID: 11173719]
